# Supplementary material for: Mutation Rates in Plastid Genomes: They Are Lower than You Might Think
Source: PubMed Central journal article supplement (PMC4453064; doi:10.1093/gbe/evv069), 2015-04-13
Supplement: supp_evv069_Supplementary_Data_R1.pdf [file supp_evv069_Supplementary_Data_R1.pdf]

## Supplementary Materials for:

### **Mutation rates in plastid genomes: they are lower than you might think.**

David Roy Smith<sup>1,\*</sup>

<sup>1</sup>Department of Biology, University of Western Ontario, London, ON, N6A 5B7, Canada.

\*Corresponding author: David Roy Smith, Department of Biology, University of Western Ontario, London, Ontario, N6A 5B7, Canada. Email: dsmit242@uwo.ca. Tel: (519) 661 2111, ext.86482.

### **Table of Contents**

|                                                                                                                                                  |           |
|--------------------------------------------------------------------------------------------------------------------------------------------------|-----------|
| <b>Supplementary Table S1. Nucleotide substitution rates between <i>Micromonas pusilla</i> CCMP1545 and <i>Micromonas</i> sp. RCC299. ....</b>   | <b>2</b>  |
| <b>Part A. Mitochondrial DNA-located genes. ....</b>                                                                                             | <b>2</b>  |
| <b>Part B. Plastid DNA-located genes.....</b>                                                                                                    | <b>2</b>  |
| <b>Supplementary Table S2. Nucleotide substitution rates between <i>Nannochloropsis gaditana</i> CCMP527 and <i>N. salina</i> CCMP1776. ....</b> | <b>3</b>  |
| <b>Part A. Mitochondrial DNA-located genes. ....</b>                                                                                             | <b>3</b>  |
| <b>Part B. Plastid DNA-located genes.....</b>                                                                                                    | <b>4</b>  |
| <b>Supplementary Table S3. Nucleotide substitution rates between <i>Ostreococcus</i> sp. RCC809 and <i>Ostreococcus tauri</i> OTTH0595. ....</b> | <b>7</b>  |
| <b>Part A. Mitochondrial DNA-located genes. ....</b>                                                                                             | <b>7</b>  |
| <b>Part B. Plastid DNA-located genes.....</b>                                                                                                    | <b>8</b>  |
| <b>Part C. Nuclear DNA-located genes.....</b>                                                                                                    | <b>10</b> |
| <b>Part D. Mitochondrial DNA intergenic regions.....</b>                                                                                         | <b>12</b> |
| <b>Part E. Plastid DNA intergenic regions.....</b>                                                                                               | <b>12</b> |

**Supplementary Table S1.** Nucleotide substitution rates between *Micromonas pusilla* CCMP1545 and *Micromonas* sp. RCC299.

**Part A. Mitochondrial DNA-located genes.**

| MtDNA gene                | # codons      | $d_N / d_S$ | $d_N$       | $d_S$        |
|---------------------------|---------------|-------------|-------------|--------------|
| <i>atp6</i>               | 249           | 0.012       | 0.155       | 13.366       |
| <i>atp9</i>               | 73            | 0.001       | 0.012       | 12.069       |
| <i>cob</i>                | 385           | 0.008       | 0.073       | 9.608        |
| <i>cox1</i>               | 527           | 0.013       | 0.099       | 7.580        |
| <i>cox2</i>               | 262           | 0.013       | 0.126       | 9.970        |
| <i>cox3</i>               | 265           | 0.002       | 0.122       | 61.852       |
| <i>nad1</i>               | 332           | 0.001       | 0.072       | 60.342       |
| <i>nad2</i>               | 495           | 0.029       | 0.365       | 12.791       |
| <i>nad3</i>               | 116           | 0.002       | 0.112       | 50.550       |
| <i>nad4</i>               | 485           | 0.002       | 0.141       | 60.250       |
| <i>nad4L</i>              | 99            | 0.049       | 0.125       | 2.561        |
| <i>nad5</i>               | 670           | 0.021       | 0.201       | 9.465        |
| <i>nad6</i>               | 262           | 0.032       | 0.383       | 11.802       |
| <i>nad7</i>               | 397           | 0.016       | 0.088       | 5.595        |
| <i>nad9</i>               | 177           | 0.003       | 0.212       | 69.797       |
| <i>rpl14</i>              | 123           | 0.034       | 0.284       | 8.347        |
| <i>rps12</i>              | 122           | 0.045       | 0.148       | 3.318        |
| <i>rps14</i>              | 98            | 0.010       | 0.448       | 43.854       |
| <i>rps19</i>              | 83            | 0.006       | 0.351       | 62.796       |
| <b>Average</b>            | <b>274.74</b> | <b>0.02</b> | <b>0.19</b> | <b>27.15</b> |
| <b>Standard deviation</b> | <b>177.13</b> | <b>0.02</b> | <b>0.12</b> | <b>25.24</b> |

**Part B. Plastid DNA-located genes.**

| PtDNA genes                  | # codons | $d_N / d_S$ | $d_N$ | $d_S$  |
|------------------------------|----------|-------------|-------|--------|
| <i>psaA</i>                  | 750      | 0.006       | 0.002 | 0.312  |
| <i>psaB</i>                  | 733      | 0.009       | 0.004 | 0.383  |
| <i>psbA</i>                  | 352      | 0.053       | 0.003 | 0.047  |
| <i>psbE</i>                  | 83       | 0.024       | 0.006 | 0.239  |
| <i>psbF</i>                  | 37       | ---         | 0.000 | 0.000  |
| <i>psbL</i>                  | 34       | ---         | 0.026 | 0.000  |
| <i>psbZ</i>                  | 61       | 0.157       | 0.037 | 0.238  |
| RNA polymerase alpha         | 351      | 0.039       | 0.091 | 2.329  |
| RNA polymerase beta chain    | 1184     | 0.004       | 0.349 | 82.106 |
| RNA polymerase beta subunit  | 1075     | 0.041       | 0.097 | 2.360  |
| RNA polymerase beta' subunit | 764      | 0.059       | 0.138 | 2.363  |

| PtDNA genes                     | # codons      | $d_N / d_S$ | $d_N$       | $d_S$        |
|---------------------------------|---------------|-------------|-------------|--------------|
| <i>rpl14</i>                    | 118           | 0.025       | 0.015       | 0.590        |
| <i>rpl16</i>                    | 138           | 0.053       | 0.026       | 0.489        |
| <i>rpl2</i>                     | 276           | 0.028       | 0.019       | 0.664        |
| <i>rpl23</i>                    | 86            | 0.054       | 0.011       | 0.201        |
| <i>rpl5</i>                     | 183           | 0.076       | 0.068       | 0.899        |
| <i>rps11</i>                    | 129           | 0.018       | 0.014       | 0.768        |
| <i>rps12</i>                    | 123           | 0.011       | 0.007       | 0.654        |
| <i>rps18</i>                    | 69            | 0.046       | 0.021       | 0.462        |
| <i>rps19</i>                    | 91            | 0.018       | 0.010       | 0.530        |
| <i>rps3</i>                     | 210           | 0.050       | 0.028       | 0.549        |
| <i>rps7</i>                     | 155           | 0.017       | 0.017       | 0.971        |
| <i>rps8</i>                     | 121           | 0.028       | 0.034       | 1.215        |
| <i>rps9</i>                     | 127           | 0.041       | 0.035       | 0.846        |
| translation initiation factor 1 | 83            | 0.019       | 0.037       | 1.925        |
| <i>tufA</i>                     | 407           | 0.028       | 0.026       | 0.960        |
| <i>ycf3</i>                     | 165           | 0.005       | 0.008       | 1.421        |
| <b>Average</b>                  | <b>292.78</b> | <b>0.04</b> | <b>0.04</b> | <b>3.83</b>  |
| <b>Standard deviation</b>       | <b>321.07</b> | <b>0.03</b> | <b>0.07</b> | <b>15.66</b> |

**Supplementary Table S2.** Nucleotide substitution rates between *Nannochloropsis gaditana* CCMP527 and *N. salina* CCMP1776.

**Part A. Mitochondrial DNA-located genes.**

| MtDNA genes  | # codons | $d_N / d_S$ | $d_N$  | $d_S$  |
|--------------|----------|-------------|--------|--------|
| <i>atp1</i>  | 519      | 0.0109      | 0.0008 | 0.0733 |
| <i>atp6</i>  | 261      | 0.0434      | 0.0017 | 0.0403 |
| <i>atp8</i>  | 104      | 0.0949      | 0.0084 | 0.088  |
| <i>atp9</i>  | 74       | 0.001       | 0.0001 | 0.0779 |
| <i>cob</i>   | 385      | 0.0331      | 0.0011 | 0.0344 |
| <i>cox1</i>  | 505      | 0.054       | 0.0068 | 0.1265 |
| <i>cox2</i>  | 301      | 0.001       | 0      | 0.0283 |
| <i>cox3</i>  | 269      | 0.001       | 0      | 0.0307 |
| <i>nad1</i>  | 325      | 0.0698      | 0.0055 | 0.078  |
| <i>nad2</i>  | 492      | 0.0367      | 0.0035 | 0.0956 |
| <i>nad3</i>  | 121      | 0.001       | 0.0001 | 0.0512 |
| <i>nad4</i>  | 524      | 0.0312      | 0.0042 | 0.133  |
| <i>nad4L</i> | 97       | 0.001       | 0.0001 | 0.1422 |
| <i>nad5</i>  | 673      | 0.0504      | 0.0036 | 0.0717 |
| <i>nad6</i>  | 194      | 0.0484      | 0.0046 | 0.0955 |
| <i>nad7</i>  | 397      | 0.0284      | 0.0033 | 0.1145 |
| <i>nad9</i>  | 188      | 0.001       | 0.0001 | 0.0903 |

| <b>MtDNA genes</b>             | <b># codons</b> | <b><math>d_N / d_S</math></b> | <b><math>d_N</math></b> | <b><math>d_S</math></b> |
|--------------------------------|-----------------|-------------------------------|-------------------------|-------------------------|
| <i>nad11</i>                   | 505             | 0.1012                        | 0.0101                  | 0.0995                  |
| <i>rpl2</i>                    | 274             | 0.0447                        | 0.0046                  | 0.102                   |
| <i>rpl5</i>                    | 178             | 0.2947                        | 0                       | 0                       |
| <i>rpl6</i>                    | 182             | 0.3321                        | 0.0308                  | 0.0926                  |
| <i>rpl14</i>                   | 125             | 0.001                         | 0                       | 0.013                   |
| <i>rpl16</i>                   | 142             | 0.0548                        | 0.003                   | 0.0541                  |
| <i>rps2</i>                    | 211             | 0.1405                        | 0.0152                  | 0.1084                  |
| <i>rps3</i>                    | 419             | 0.1441                        | 0.0144                  | 0.0998                  |
| <i>rps4</i>                    | 240             | 0.1335                        | 0.0108                  | 0.0809                  |
| <i>rps7</i>                    | 144             | 0.0391                        | 0.0056                  | 0.1436                  |
| <i>rps8</i>                    | 127             | 0.001                         | 0                       | 0.0313                  |
| <i>rps10</i>                   | 111             | 0.2484                        | 0.0238                  | 0.0959                  |
| <i>rps11</i>                   | 155             | 0.0288                        | 0.0058                  | 0.2009                  |
| <i>rps12</i>                   | 124             | 0.001                         | 0.0001                  | 0.0957                  |
| <i>rps13</i>                   | 117             | 0.001                         | 0.0001                  | 0.1202                  |
| <i>rps14</i>                   | 97              | 0.1729                        | 0.0088                  | 0.0506                  |
| <i>rps19</i>                   | 84              | 0.001                         | 0                       | 0.0174                  |
| <i>tatC</i>                    | 238             | 0.0918                        | 0.008                   | 0.0873                  |
| <b>Average</b>                 | <b>254.34</b>   | <b>0.067</b>                  | <b>0.005</b>            | <b>0.082</b>            |
| <b>Standard deviation</b>      | <b>159.91</b>   | <b>0.085</b>                  | <b>0.007</b>            | <b>0.043</b>            |
| <b>Concatenated rRNA genes</b> | 3742 nt         |                               | $d_i = 0.005$           |                         |

### Part B. Plastid DNA-located genes.

| <b>PtDNA genes</b> | <b># codons</b> | <b><math>d_N / d_S</math></b> | <b><math>d_N</math></b> | <b><math>d_S</math></b> |
|--------------------|-----------------|-------------------------------|-------------------------|-------------------------|
| <i>atpA</i>        | 504             | 0.016                         | 0.001                   | 0.052                   |
| <i>atpB</i>        | 489             | 0.011                         | 0.001                   | 0.074                   |
| <i>atpD</i>        | 231             | 0.078                         | 0.006                   | 0.070                   |
| <i>atpE</i>        | 138             | 0.194                         | 0.003                   | 0.015                   |
| <i>atpF</i>        | 154             | 0.183                         | 0.006                   | 0.032                   |
| <i>atpG</i>        | 159             | 0.114                         | 0.003                   | 0.026                   |
| <i>atpH</i>        | 82              | 0.000                         | 0.000                   | 0.000                   |
| <i>atpI</i>        | 248             | 0.043                         | 0.002                   | 0.042                   |
| <i>cbbX</i>        | 335             | 0.030                         | 0.004                   | 0.124                   |
| <i>ccsI</i>        | 422             | 0.077                         | 0.006                   | 0.077                   |
| <i>ccsA</i>        | 302             | 0.074                         | 0.004                   | 0.059                   |
| <i>chlB</i>        | 506             | 0.038                         | 0.004                   | 0.104                   |
| <i>chlI</i>        | 410             | 0.077                         | 0.007                   | 0.093                   |
| <i>chlL</i>        | 287             | 0.019                         | 0.001                   | 0.074                   |
| <i>chlN</i>        | 443             | 0.038                         | 0.005                   | 0.125                   |
| <i>clpA</i>        | 148             | 0.386                         | 0.017                   | 0.044                   |
| <i>clpCI</i>       | 383             | 0.019                         | 0.002                   | 0.115                   |

| PtDNA genes  | # codons | $d_N / d_S$ | $d_N$ | $d_S$ |
|--------------|----------|-------------|-------|-------|
| <i>clpC2</i> | 448      | 0.061       | 0.007 | 0.106 |
| <i>dnaK</i>  | 601      | 0.032       | 0.003 | 0.085 |
| <i>ftsH</i>  | 696      | 0.049       | 0.003 | 0.060 |
| <i>groEL</i> | 534      | 0.045       | 0.007 | 0.153 |
| <i>ilvB</i>  | 591      | 0.083       | 0.006 | 0.066 |
| <i>petA</i>  | 318      | 0.016       | 0.001 | 0.081 |
| <i>petB</i>  | 214      | 0.001       | 0.000 | 0.029 |
| <i>petD</i>  | 159      | 0.001       | 0.000 | 0.023 |
| <i>petF</i>  | 101      | 0.001       | 0.000 | 0.084 |
| <i>petG</i>  | 33       | 0.001       | 0.000 | 0.040 |
| <i>petJ</i>  | 120      | 0.211       | 0.004 | 0.016 |
| <i>petL</i>  | 30       | ---         | 0.017 | 0.000 |
| <i>petM</i>  | 30       | 0.001       | 0.000 | 0.308 |
| <i>petN</i>  | 28       | 0.001       | 0.000 | 0.000 |
| <i>psaA</i>  | 744      | 0.001       | 0.000 | 0.054 |
| <i>psaB</i>  | 736      | 0.019       | 0.001 | 0.060 |
| <i>psaC</i>  | 80       | 0.106       | 0.005 | 0.049 |
| <i>psaD</i>  | 135      | 0.001       | 0.000 | 0.049 |
| <i>psaE</i>  | 66       | 3.980       | 0.000 | 0.000 |
| <i>psaF</i>  | 183      | 0.014       | 0.002 | 0.160 |
| <i>psaI</i>  | 44       | 0.001       | 0.000 | 0.143 |
| <i>psaJ</i>  | 40       | 0.001       | 0.000 | 0.057 |
| <i>psaL</i>  | 171      | 0.035       | 0.003 | 0.073 |
| <i>psaM</i>  | 29       | 0.000       | 0.000 | 0.000 |
| <i>psb28</i> | 112      | 0.124       | 0.013 | 0.108 |
| <i>psbA</i>  | 359      | 0.001       | 0.000 | 0.006 |
| <i>psbB</i>  | 508      | 0.001       | 0.000 | 0.082 |
| <i>psbC</i>  | 468      | 0.017       | 0.001 | 0.055 |
| <i>psbD</i>  | 355      | 0.001       | 0.000 | 0.044 |
| <i>psbE</i>  | 82       | 0.270       | 0.000 | 0.000 |
| <i>psbF</i>  | 42       | 0.001       | 0.000 | 0.108 |
| <i>psbH</i>  | 66       | 0.001       | 0.000 | 0.048 |
| <i>psbI</i>  | 37       | 0.404       | 0.000 | 0.000 |
| <i>psbJ</i>  | 38       | 0.001       | 0.000 | 0.043 |
| <i>psbK</i>  | 43       | 0.001       | 0.000 | 0.027 |
| <i>psbL</i>  | 41       | 0.001       | 0.000 | 0.000 |
| <i>psbN</i>  | 51       | 0.001       | 0.000 | 0.023 |
| <i>psbT</i>  | 31       | 0.000       | 0.014 | 0.000 |
| <i>psbV</i>  | 161      | 0.059       | 0.003 | 0.042 |
| <i>psbX</i>  | 38       | 0.020       | 0.000 | 0.000 |
| <i>psbY</i>  | 35       | 0.000       | 0.000 | 0.000 |
| <i>psbZ</i>  | 60       | 0.001       | 0.000 | 0.082 |

| <b>PtDNA genes</b> | <b># codons</b> | <b><math>d_N / d_S</math></b> | <b><math>d_N</math></b> | <b><math>d_S</math></b> |
|--------------------|-----------------|-------------------------------|-------------------------|-------------------------|
| <i>rbcL</i>        | 486             | 0.021                         | 0.001                   | 0.044                   |
| <i>rbcS</i>        | 88              | 0.169                         | 0.011                   | 0.063                   |
| <i>rpl1</i>        | 224             | 0.107                         | 0.008                   | 0.070                   |
| <i>rpl2</i>        | 274             | 0.062                         | 0.005                   | 0.073                   |
| <i>rpl3</i>        | 203             | 0.001                         | 0.000                   | 0.117                   |
| <i>rpl4</i>        | 253             | 0.196                         | 0.010                   | 0.052                   |
| <i>rpl5</i>        | 183             | 0.115                         | 0.002                   | 0.020                   |
| <i>rpl6</i>        | 179             | 0.045                         | 0.005                   | 0.104                   |
| <i>rpl11</i>       | 141             | 0.067                         | 0.003                   | 0.044                   |
| <i>rpl12</i>       | 129             | 0.063                         | 0.003                   | 0.052                   |
| <i>rpl13</i>       | 144             | 0.073                         | 0.006                   | 0.078                   |
| <i>rpl14</i>       | 120             | 0.001                         | 0.000                   | 0.130                   |
| <i>rpl16</i>       | 137             | 0.001                         | 0.000                   | 0.047                   |
| <i>rpl18</i>       | 103             | 0.419                         | 0.008                   | 0.019                   |
| <i>rpl19</i>       | 121             | 0.340                         | 0.015                   | 0.043                   |
| <i>rpl20</i>       | 133             | 0.141                         | 0.006                   | 0.044                   |
| <i>rpl21</i>       | 148             | 0.191                         | 0.005                   | 0.029                   |
| <i>rpl22</i>       | 153             | 0.001                         | 0.000                   | 0.104                   |
| <i>rpl23</i>       | 118             | 0.044                         | 0.004                   | 0.081                   |
| <i>rpl27</i>       | 107             | 0.123                         | 0.012                   | 0.096                   |
| <i>rpl29</i>       | 70              | 0.001                         | 0.000                   | 0.034                   |
| <i>rpl31</i>       | 73              | 0.001                         | 0.000                   | 0.050                   |
| <i>rpl32</i>       | 54              | 0.048                         | 0.016                   | 0.330                   |
| <i>rpl33</i>       | 63              | 0.001                         | 0.000                   | 0.061                   |
| <i>rpl34</i>       | 48              | 0.000                         | 0.008                   | 0.000                   |
| <i>rpl35</i>       | 63              | 0.001                         | 0.000                   | 0.076                   |
| <i>rpl36</i>       | 36              | 0.001                         | 0.000                   | 0.133                   |
| <i>rpoA</i>        | 443             | 0.146                         | 0.008                   | 0.057                   |
| <i>rpoB</i>        | 1054            | 0.004                         | 0.000                   | 0.095                   |
| <i>rpoC1</i>       | 749             | 0.066                         | 0.006                   | 0.094                   |
| <i>rpoC2</i>       | 1317            | 0.069                         | 0.006                   | 0.084                   |
| <i>rps2</i>        | 249             | 0.045                         | 0.002                   | 0.036                   |
| <i>rps3</i>        | 85              | 0.072                         | 0.005                   | 0.069                   |
| <i>rps4</i>        | 207             | 0.026                         | 0.002                   | 0.079                   |
| <i>rps5</i>        | 176             | 0.076                         | 0.005                   | 0.062                   |
| <i>rps6</i>        | 105             | 0.001                         | 0.000                   | 0.104                   |
| <i>rps7</i>        | 157             | 0.049                         | 0.003                   | 0.053                   |
| <i>rps8</i>        | 131             | 0.112                         | 0.003                   | 0.029                   |
| <i>rps9</i>        | 135             | 0.001                         | 0.000                   | 0.227                   |
| <i>rps10</i>       | 114             | 0.393                         | 0.011                   | 0.029                   |
| <i>rps11</i>       | 126             | 0.001                         | 0.000                   | 0.089                   |
| <i>rps12</i>       | 124             | 0.001                         | 0.000                   | 0.084                   |

| PtDNA genes                    | # codons      | $d_N / d_S$  | $d_N$         | $d_S$        |
|--------------------------------|---------------|--------------|---------------|--------------|
| <i>rps13</i>                   | 122           | 0.037        | 0.003         | 0.086        |
| <i>rps14</i>                   | 99            | 0.224        | 0.009         | 0.041        |
| <i>rps16</i>                   | 83            | 0.001        | 0.000         | 0.030        |
| <i>rps17</i>                   | 84            | 0.001        | 0.000         | 0.072        |
| <i>rps18</i>                   | 71            | 0.001        | 0.000         | 0.021        |
| <i>rps19</i>                   | 94            | 0.042        | 0.004         | 0.101        |
| <i>rps20</i>                   | 95            | 0.053        | 0.004         | 0.083        |
| <i>secA</i>                    | 867           | 0.041        | 0.003         | 0.080        |
| <i>secY</i>                    | 378           | 0.227        | 0.007         | 0.031        |
| <i>tatC</i>                    | 251           | 0.068        | 0.005         | 0.080        |
| <i>thiG</i>                    | 268           | 0.092        | 0.005         | 0.051        |
| <i>thiS</i>                    | 75            | 0.162        | 0.016         | 0.097        |
| <i>tufA</i>                    | 408           | 0.012        | 0.001         | 0.086        |
| <i>ycf3</i>                    | 166           | 0.001        | 0.000         | 0.071        |
| <i>ycf4</i>                    | 194           | 0.001        | 0.000         | 0.142        |
| <i>ycf12</i>                   | 33            | 0.129        | 0.000         | 0.000        |
| <i>ycf16</i>                   | 282           | 0.131        | 0.011         | 0.085        |
| <i>ycf24</i>                   | 496           | 0.040        | 0.003         | 0.085        |
| <i>ycf34</i>                   | 84            | 0.056        | 0.015         | 0.263        |
| <i>ycf36</i>                   | 165           | 0.117        | 0.011         | 0.092        |
| <i>ycf46</i>                   | 498           | 0.115        | 0.009         | 0.082        |
| <i>ycf49</i>                   | 96            | 0.362        | 0.014         | 0.039        |
| <i>ycf54</i>                   | 106           | 0.927        | 0.013         | 0.014        |
| <i>ycf59</i>                   | 346           | 0.071        | 0.005         | 0.069        |
| <i>ycf66</i>                   | 100           | 0.001        | 0.000         | 0.060        |
| <b>Average</b>                 | <b>225.26</b> | <b>0.105</b> | <b>0.004</b>  | <b>0.068</b> |
| <b>Standard deviation</b>      | <b>221.47</b> | <b>0.370</b> | <b>0.004</b>  | <b>0.054</b> |
| <b>Concatenated rRNA genes</b> | 4552 nt       |              | $d_i = 0.004$ |              |

**Supplementary Table S3.** Nucleotide substitution rates between *Ostreococcus* sp. RCC809 and *Ostreococcus tauri* OTTH0595.

**Part A. Mitochondrial DNA-located genes.**

| MtDNA genes | # codons | $d_N / d_S$ | $d_N$ | $d_S$  |
|-------------|----------|-------------|-------|--------|
| <i>atp1</i> | 506      | 0.016       | 0.035 | 2.214  |
| <i>atp6</i> | 381      | 0.009       | 0.026 | 2.830  |
| <i>atp8</i> | 165      | 0.005       | 0.370 | 79.057 |
| <i>atp9</i> | 73       | 0.001       | 0.001 | 0.570  |
| <i>cob</i>  | 248      | 0.007       | 0.024 | 3.421  |
| <i>cox1</i> | 528      | 0.008       | 0.019 | 2.392  |
| <i>cox2</i> | 256      | 0.017       | 0.050 | 3.003  |

| <b>MtDNA genes</b>        | <b># codons</b> | <b><math>d_N / d_S</math></b> | <b><math>d_N</math></b> | <b><math>d_S</math></b>  |
|---------------------------|-----------------|-------------------------------|-------------------------|--------------------------|
| <i>cox3</i>               | 263             | 0.032                         | 0.048                   | 1.520                    |
| <i>nad1</i>               | 327             | 0.007                         | 0.026                   | 3.820                    |
| <i>nad2</i>               | 496             | 0.022                         | 0.162                   | 7.315                    |
| <i>nad3</i>               | 114             | 0.004                         | 0.034                   | 8.168                    |
| <i>nad4</i>               | 488             | 0.015                         | 0.060                   | 4.089                    |
| <i>nad4L</i>              | 99              | 0.003                         | 0.110                   | 35.642                   |
| <i>nad5</i>               | 667             | 0.017                         | 0.064                   | 3.819                    |
| <i>nad6</i>               | 255             | 0.049                         | 0.176                   | 3.604                    |
| <i>nad7</i>               | 393             | 0.003                         | 0.015                   | 4.937                    |
| <i>nad9</i>               | 184             | 0.034                         | 0.149                   | 4.415                    |
| <i>ndhk</i>               | 165             | 0.006                         | 0.035                   | 5.485                    |
| <i>rpl14</i>              | 123             | 0.023                         | 0.113                   | 4.929                    |
| <i>rpl16</i>              | 132             | 0.048                         | 0.105                   | 2.208                    |
| <i>rpl5</i>               | 177             | 0.090                         | 0.320                   | 3.566                    |
| <i>rpl6</i>               | 186             | 0.003                         | 0.280                   | 85.703                   |
| <i>rps10</i>              | 113             | 0.005                         | 0.386                   | 74.577                   |
| <i>rps11</i>              | 120             | 0.041                         | 0.142                   | 3.444                    |
| <i>rps12</i>              | 120             | 0.022                         | 0.067                   | 3.014                    |
| <i>rps13</i>              | 115             | 0.030                         | 0.150                   | 5.072                    |
| <i>rps14</i>              | 98              | 0.003                         | 0.212                   | 79.618                   |
| <i>rps19</i>              | 79              | 0.002                         | 0.156                   | 77.068                   |
| <i>rps2</i>               | 197             | 0.043                         | 0.265                   | 6.111                    |
| <i>rps3</i>               | 276             | 0.012                         | 0.298                   | 25.422                   |
| <i>rps4</i>               | 204             | 0.021                         | 0.278                   | 13.211                   |
| <i>rps7</i>               | 163             | 0.064                         | 0.260                   | 4.070                    |
| <i>rps8</i>               | 123             | 0.072                         | 0.225                   | 3.123                    |
| <i>ymf39</i>              | 179             | 0.011                         | 0.272                   | 24.845                   |
| <b>Average</b>            | <b>235.68</b>   | <b>0.02</b>                   | <b>0.15</b>             | <b>17.42<sup>a</sup></b> |
| <b>Standard deviation</b> | <b>151.66</b>   | <b>0.02</b>                   | <b>0.11</b>             | <b>27.12</b>             |

<sup>a</sup>When the eight genes with extremely high  $d_S$  values (>24) are removed from the analysis, the average synonymous-site substitution rate drops to 4.24 (standard deviation = 2.48).

### Part B. Plastid DNA-located genes.

| <b>PtDNA genes</b> | <b># codons</b> | <b><math>d_N / d_S</math></b> | <b><math>d_N</math></b> | <b><math>d_S</math></b> |
|--------------------|-----------------|-------------------------------|-------------------------|-------------------------|
| <i>atpA</i>        | 502             | 0.052                         | 0.026                   | 0.495                   |
| <i>atpB</i>        | 480             | 0.021                         | 0.014                   | 0.647                   |
| <i>atpE</i>        | 141             | 0.034                         | 0.044                   | 1.278                   |
| <i>atpF</i>        | 167             | 0.067                         | 0.046                   | 0.683                   |
| <i>atpH</i>        | 100             | 0.037                         | 0.004                   | 0.114                   |
| <i>atpI</i>        | 235             | 0.011                         | 0.006                   | 0.536                   |
| <i>clpP</i>        | 199             | 0.002                         | 0.004                   | 1.763                   |
| <i>infA</i>        | 77              | 0.047                         | 0.040                   | 0.854                   |



| <b>PtDNA genes</b> | <b># codons</b> | <b><math>d_N / d_S</math></b> | <b><math>d_N</math></b> | <b><math>d_S</math></b> |
|--------------------|-----------------|-------------------------------|-------------------------|-------------------------|
| <i>petA</i>        | 306             | 0.047                         | 0.052                   | 1.110                   |
| <i>petB</i>        | 214             | 0.019                         | 0.010                   | 0.531                   |
| <i>petG</i>        | 36              | 0.001                         | 0.000                   | 0.242                   |
| <i>psaA</i>        | 750             | 0.012                         | 0.004                   | 0.360                   |
| <i>psaB</i>        | 732             | 0.017                         | 0.009                   | 0.553                   |
| <i>psaC</i>        | 80              | 0.001                         | 0.001                   | 0.851                   |
| <i>psaI</i>        | 35              | 0.001                         | 0.001                   | 0.703                   |
| <i>psaJ</i>        | 41              | 0.069                         | 0.045                   | 0.656                   |
| <i>psaM</i>        | 30              | 0.001                         | 0.000                   | 0.298                   |
| <i>psbA</i>        | 352             | 0.037                         | 0.004                   | 0.103                   |
| <i>psbB</i>        | 442             | 0.018                         | 0.007                   | 0.400                   |
| <i>psbC</i>        | 460             | 0.037                         | 0.015                   | 0.396                   |
| <i>psbD</i>        | 351             | 0.011                         | 0.004                   | 0.351                   |
| <i>psbE</i>        | 81              | 0.115                         | 0.032                   | 0.277                   |
| <i>psbF</i>        | 37              | 0.001                         | 0.000                   | 0.077                   |
| <i>psbH</i>        | 77              | 0.033                         | 0.012                   | 0.343                   |
| <i>psbI</i>        | 37              | 0.001                         | 0.000                   | 0.154                   |
| <i>psbJ</i>        | 40              | 0.211                         | 0.023                   | 0.110                   |
| <i>psbK</i>        | 44              | 0.063                         | 0.021                   | 0.330                   |
| <i>psbL</i>        | 37              | 0.001                         | 0.000                   | 0.110                   |
| <i>psbN</i>        | 43              | 0.015                         | 0.009                   | 0.611                   |
| <i>psbT</i>        | 30              | 0.193                         | 0.016                   | 0.082                   |
| <i>rbcL</i>        | 474             | 0.090                         | 0.021                   | 0.232                   |
| <i>rpl14</i>       | 32              | 0.162                         | 0.044                   | 0.272                   |
| <i>rpl16</i>       | 137             | 0.028                         | 0.022                   | 0.799                   |
| <i>rpl2</i>        | 276             | 0.035                         | 0.028                   | 0.813                   |
| <i>rpl20</i>       | 110             | 0.037                         | 0.052                   | 1.410                   |
| <i>rpl23</i>       | 86              | 0.022                         | 0.006                   | 0.253                   |
| <i>rpl32</i>       | 71              | 0.086                         | 0.097                   | 1.127                   |
| <i>rpl36</i>       | 36              | 0.001                         | 0.001                   | 1.447                   |
| <i>rpl5</i>        | 183             | 0.061                         | 0.039                   | 0.637                   |
| <i>rpoA</i>        | 355             | 0.041                         | 0.122                   | 2.961                   |
| <i>rpoB</i>        | 1087            | 0.024                         | 0.054                   | 2.293                   |
| <i>rpoC1</i>       | 736             | 0.055                         | 0.102                   | 1.855                   |
| <i>rpoC2</i>       | 1007            | 0.066                         | 0.227                   | 3.425                   |
| <i>rps11</i>       | 129             | 0.005                         | 0.003                   | 0.679                   |
| <i>rps12</i>       | 123             | 0.009                         | 0.007                   | 0.776                   |
| <i>rps14</i>       | 99              | 0.033                         | 0.027                   | 0.808                   |
| <i>rps19</i>       | 91              | 0.017                         | 0.010                   | 0.562                   |
| <i>rps2</i>        | 223             | 0.071                         | 0.076                   | 1.060                   |
| <i>rps3</i>        | 210             | 0.036                         | 0.024                   | 0.674                   |
| <i>rps4</i>        | 196             | 0.049                         | 0.048                   | 0.980                   |

| PtDNA genes               | # codons      | $d_N / d_S$ | $d_N$       | $d_S$       |
|---------------------------|---------------|-------------|-------------|-------------|
| <i>rps7</i>               | 155           | 0.021       | 0.020       | 0.962       |
| <i>rps8</i>               | 121           | 0.068       | 0.032       | 0.472       |
| <i>rps9</i>               | 126           | 0.064       | 0.025       | 0.391       |
| <i>tufA</i>               | 408           | 0.051       | 0.040       | 0.785       |
| <i>ycf12</i>              | 118           | 0.031       | 0.011       | 0.361       |
| <i>ycf3</i>               | 165           | 0.001       | 0.002       | 2.098       |
| <i>ycf9</i>               | 61            | 0.024       | 0.008       | 0.307       |
| <b>Average</b>            | <b>227.56</b> | <b>0.04</b> | <b>0.03</b> | <b>0.76</b> |
| <b>Standard deviation</b> | <b>243.00</b> | <b>0.04</b> | <b>0.04</b> | <b>0.68</b> |

### Part C. Nuclear DNA-located genes.

| NucDNA genes                                                   | # codons | $d_N / d_S$ | $d_N$ | $d_S$  |
|----------------------------------------------------------------|----------|-------------|-------|--------|
| RNA homing endonuclease                                        | 72       | 0.001       | 0.000 | 0.000  |
| Senescence-associated protein                                  | 144      | 0.474       | 0.000 | 0.000  |
| Eif4 eukaryotic translation initiation factor                  | 586      | 0.025       | 0.343 | 13.833 |
| psaL photosystem I subunit XI                                  | 200      | 0.019       | 0.178 | 9.192  |
| ATP synthase beta chain, mitochondrial precursor               | 527      | 0.002       | 0.096 | 61.767 |
| ATP synthase delta subunit 2                                   | 176      | 0.048       | 0.189 | 3.934  |
| ATP synthase F1 alpha subunit                                  | 562      | 0.039       | 0.136 | 3.509  |
| Chloroplast light-harvesting complex I protein precursor Lhca4 | 235      | 0.072       | 0.167 | 2.310  |
| Chlorophyll a/b-binding protein CP29                           | 234      | 0.118       | 0.179 | 1.521  |
| Dynein 8 kDa light chain flagellar outer arm                   | 90       | 0.047       | 0.156 | 3.315  |
| rpl9                                                           | 204      | 0.062       | 0.154 | 2.487  |
| ATP synthase mt F1 assembly factor 2                           | 240      | 0.036       | 0.122 | 3.387  |
| histone H3                                                     | 119      | 0.025       | 0.046 | 1.878  |
| cytochrome P450                                                | 522      | 0.025       | 0.066 | 2.647  |
| ubiquinol cytochrome C reductase                               | 57       | 0.001       | 0.077 | 76.563 |
| rpl9                                                           | 191      | 0.034       | 0.116 | 3.397  |
| rpl28                                                          | 146      | 0.060       | 0.104 | 1.738  |
| gpsA glycerol-3-phosphate dehydrogenase                        | 172      | 0.019       | 0.071 | 3.678  |
| psbB oxygen-evolving complex-related                           | 352      | 0.031       | 0.061 | 1.975  |
| acetyl-CoA carboxylase                                         | 1130     | 0.036       | 0.069 | 1.903  |
| glucose-6-phosphate phosphate translocator 2                   | 300      | 0.022       | 0.037 | 1.691  |
| glutamine amidotransferase cyclase                             | 537      | 0.033       | 0.060 | 1.815  |
| indole-3-glycerol phosphate lysase                             | 271      | 0.091       | 0.113 | 1.241  |
| ubiquinol-cytochrome-c reductase cytochrome c1                 | 272      | 0.048       | 0.098 | 2.032  |
| rpl2                                                           | 265      | 0.059       | 0.064 | 1.095  |
| Tpt phosphate/phosphoenolpyruvate                              | 302      | 0.042       | 0.070 | 1.639  |

| <b>NucDNA genes</b>                                     | <b># codons</b> | <b><math>d_N / d_S</math></b> | <b><math>d_N</math></b> | <b><math>d_S</math></b> |
|---------------------------------------------------------|-----------------|-------------------------------|-------------------------|-------------------------|
| translocator                                            |                 |                               |                         |                         |
| rpl17                                                   | 182             | 0.091                         | 0.095                   | 1.050                   |
| chloroplast ribose-5-phosphate isomerase                | 249             | 0.019                         | 0.045                   | 2.390                   |
| ribulose-1,5-bisphosphate carboxylase<br>small subunit  | 167             | 0.107                         | 0.115                   | 1.073                   |
| uridine monophosphate synthetase                        | 474             | 0.029                         | 0.046                   | 1.556                   |
| rps1                                                    | 249             | 0.058                         | 0.060                   | 1.033                   |
| translation elongation factor<br>mitochondrial          | 420             | 0.063                         | 0.059                   | 0.932                   |
| psaF                                                    | 228             | 0.099                         | 0.070                   | 0.707                   |
| GTP-binding regulatory protein beta<br>chain            | 318             | 0.049                         | 0.049                   | 0.995                   |
| rpl27                                                   | 134             | 0.033                         | 0.041                   | 1.244                   |
| tauri beta tubulin                                      | 432             | 0.012                         | 0.013                   | 1.039                   |
| rpl15-2                                                 | 188             | 0.033                         | 0.027                   | 0.831                   |
| RuBisCO activase                                        | 405             | 0.048                         | 0.039                   | 0.826                   |
| rpl3                                                    | 91              | 0.066                         | 0.040                   | 0.601                   |
| rpl37                                                   | 128             | 0.038                         | 0.029                   | 0.755                   |
| rps11                                                   | 299             | 0.036                         | 0.028                   | 0.770                   |
| Ferredoxin-NADP oxidoreductase<br>chloroplast precursor | 378             | 0.067                         | 0.039                   | 0.588                   |
| rps29                                                   | 55              | 0.045                         | 0.036                   | 0.815                   |
| cytochrome b6 f complex subunit4                        | 158             | 0.026                         | 0.021                   | 0.811                   |
| GTP-binding protein sar1                                | 192             | 0.016                         | 0.013                   | 0.800                   |
| rpl35                                                   | 104             | 0.043                         | 0.032                   | 0.739                   |
| histone H2A                                             | 120             | 0.016                         | 0.011                   | 0.656                   |
| rps14                                                   | 138             | 0.018                         | 0.010                   | 0.519                   |
| adenosylhomocysteinase                                  | 481             | 0.034                         | 0.022                   | 0.641                   |
| psaE photosystem I reaction center<br>subunit           | 53              | 0.026                         | 0.016                   | 0.601                   |
| RNA polymerase II                                       | 71              | 0.039                         | 0.023                   | 0.589                   |
| psaD, PSI-D, subunit II, photosystem I<br>protein       | 131             | 0.046                         | 0.026                   | 0.566                   |
| rpl22                                                   | 111             | 0.033                         | 0.029                   | 0.861                   |
| rps15                                                   | 129             | 0.015                         | 0.010                   | 0.624                   |
| EF1 elongation factor 1-alpha                           | 466             | 0.057                         | 0.028                   | 0.491                   |
| H3 and H4                                               | 134             | 0.046                         | 0.020                   | 0.437                   |
| rps24                                                   | 130             | 0.044                         | 0.022                   | 0.500                   |
| rpsL15/L27                                              | 146             | 0.052                         | 0.023                   | 0.447                   |
| histone H2B                                             | 110             | 0.005                         | 0.004                   | 0.734                   |
| histone H3.3                                            | 135             | 0.001                         | 0.000                   | 0.212                   |
| <b>Average</b>                                          | <b>251.87</b>   | <b>0.05</b>                   | <b>0.07</b>             | <b>3.93<sup>a</sup></b> |
| <b>Standard deviation</b>                               | <b>184.50</b>   | <b>0.06</b>                   | <b>0.06</b>             | <b>12.47</b>            |

<sup>a</sup>When the two genes with extremely high  $d_S$  values (>25) are removed from the analysis, the average synonymous-site substitution rate drops to 1.68 (standard deviation = 2.15).

**Part D. Mitochondrial DNA intergenic regions.**

| <b>MtDNA intergenic region</b> | <b>Alignment length (nt)</b> | <b><math>d_i</math></b> |
|--------------------------------|------------------------------|-------------------------|
| <i>cob / trnQ</i>              | 52                           | 9                       |
| <i>trnH / ndhK</i>             | 507                          | 2.316                   |
| <i>atp9 / trnL</i>             | 60                           | 1.316                   |
| <i>atp6 / trnG</i>             | 36                           | 1.179                   |
| <i>nad9 / atp1</i>             | 55                           | 2.212                   |
| <i>nad4 / nad2</i>             | 54                           | 0.733                   |
| <i>nad5 / nad4</i>             | 48                           | 0.970                   |
| <i>nad6 / atp6</i>             | 63                           | 0.632                   |
| <i>ymf39 / cox1</i>            | 175                          | 0.466                   |
| <i>rps11 / atp9</i>            | 78                           | 0.557                   |
| <i>nad2 / cox3</i>             | 37                           | 0.503                   |
| <i>rrs / trnM</i>              | 38                           | 0.549                   |
| <i>trnG / trnR</i>             | 289                          | 0.423                   |
| <i>rps12 / cob</i>             | 53                           | 0.652                   |
| <b>Average</b>                 | <b>110.36</b>                | <b>1.54</b>             |
| <b>Standard deviation</b>      | <b>133.65</b>                | <b>2.23</b>             |

**Part E. Plastid DNA intergenic regions.**

| <b>PtDNA intergenic regions</b> | <b>Alignment length (nt)</b> | <b><math>d_i</math></b> |
|---------------------------------|------------------------------|-------------------------|
| <i>psbA-rrl</i>                 | 442                          | 4.448                   |
| <i>psaJ-trnF</i>                | 117                          | 2.275                   |
| <i>trnN-ORF1260</i>             | 194                          | 4.052                   |
| <i>petB-trnK</i>                | 109                          | 1.601                   |
| <i>rbcL-petG</i>                | 149                          | 1.388                   |
| <i>atpE-clpP</i>                | 110                          | 2.023                   |
| <i>rpl32-ORF537</i>             | 164                          | 1.700                   |
| <i>trnL-trnE</i>                | 92                           | 1.224                   |
| <i>trnN-trnT</i>                | 117                          | 0.894                   |
| <i>psaI-ycf12</i>               | 90                           | 0.933                   |
| <i>atpA-rps14</i>               | 195                          | 1.239                   |
| <i>psbN-rps4</i>                | 152                          | 0.828                   |
| <i>psbA-petG</i>                | 232                          | 0.655                   |
| <i>ORF1260-psbE</i>             | 163                          | 0.682                   |
| <i>psaB-petA</i>                | 338                          | 0.616                   |
| <i>trnD-psaA</i>                | 354                          | 0.627                   |
| <i>rps2-rrs</i>                 | 119                          | 0.621                   |
| <i>psaC-atpB</i>                | 180                          | 0.954                   |
| <i>rpl20-trnS</i>               | 77                           | 0.618                   |
| <i>rps7-tufA</i>                | 106                          | 0.627                   |

| <b>PtDNA intergenic regions</b> | <b>Alignment length (nt)</b> | <b><math>d_i</math></b> |
|---------------------------------|------------------------------|-------------------------|
| <i>psbT-psbD</i>                | 204                          | 0.576                   |
| <i>clpP-rpl32</i>               | 209                          | 0.642                   |
| <i>atpB-atpE</i>                | 59                           | 0.650                   |
| <i>psbE-psbF</i>                | 95                           | 0.586                   |
| <i>rps19-rps3</i>               | 73                           | 0.538                   |
| <i>trnM-rpl23</i>               | 202                          | 0.508                   |
| <i>atpI-atpH</i>                | 179                          | 0.476                   |
| <i>psbC-trnR</i>                | 127                          | 0.469                   |
| <i>ycf9-trnM</i>                | 195                          | 0.712                   |
| <i>psbI-psaJ</i>                | 85                           | 0.429                   |
| <i>trnC-rpoB</i>                | 109                          | 0.402                   |
| <i>rps9-trnL</i>                | 119                          | 0.457                   |
| <i>rps4-ycf3</i>                | 158                          | 0.370                   |
| <i>trnS-rpl20</i>               | 171                          | 0.389                   |
| <i>trnF-rbcL</i>                | 125                          | 0.363                   |
| <i>psbJ-petB</i>                | 143                          | 0.344                   |
| <i>rps18-trnE</i>               | 188                          | 0.348                   |
| <i>trnK-psaC</i>                | 99                           | 0.291                   |
| <i>trnS-psbK</i>                | 105                          | 0.291                   |
| <i>atpH-atpF</i>                | 175                          | 0.284                   |
| <i>trnM-trnG</i>                | 367                          | 0.244                   |
| <i>tufa-trnC</i>                | 327                          | 0.224                   |
| <i>trnL-atpI</i>                | 111                          | 0.272                   |
| <i>rps14-trnQ</i>               | 70                           | 0.257                   |
| <i>psaM-trnP</i>                | 137                          | 0.202                   |
| <i>atpF-atpA</i>                | 169                          | 0.192                   |
| <i>psbH-psbN</i>                | 82                           | 0.142                   |
| <i>trnV-psbB</i>                | 280                          | 0.061                   |
| <b>Average</b>                  | <b>163.81</b>                | <b>0.81</b>             |
| <b>Standard deviation</b>       | <b>84.87</b>                 | <b>0.87</b>             |
